# Supplementary material for: Arabidopsis C‐terminal binding protein ANGUSTIFOLIA modulates transcriptional co‐regulation of MYB46 and WRKY33
Source: PubMed Central journal article supplement — New Phytol. 2020 Aug 19;228(5):1627–39. doi: 10.1111/nph.16826 (PMC7692920; doi:10.1111/nph.16826), 2020-08-19
Supplement: NPH-228-1627-s001.pdf [file NPH-228-1627-s001.pdf]

***New Phytologist* Supporting Information**

**Article title: *Arabidopsis* C-terminal Binding Protein ANGUSTIFOLIA modulates transcriptional co-regulation of *MYB46* and *WRKY33***

Authors: Meng Xie, Jin Zhang, Tao Yao, Anthony C. Bryan, Yunqiao Pu, Jessy Labbé, Dale A. Pelletier, Nancy Engle, Jennifer L. Morrell-Falvey, Jeremy Schmutz, Arthur J. Ragauskas, Timothy J. Tschaplinski, Feng Chen, Gerald A. Tuskan, Wellington Muchero, and Jin-Gui Chen

Article acceptance date: 26 June 2020

The following Supporting Information is available for this article:

**Fig. S1** Overexpression of Myc tagged AN (AN-Myc) in *an-t1* (*an-t1 35S:AN*) reverses its narrow-leaf phenotype to wild type morphology.

(a) qPCR analysis of AN transcript in Col-0, *an-t1*, and *an-t1 35S:AN*. Values represent means  $\pm$  SEM, n = 3. Statistical significance was determined by two tailed students t-tests against Col-0 (\*\*  $P < 0.01$ ).

(b) Phenotypes of three-week-old seedlings of Col-0, *an-t1*, and *an-t1 35S:AN*.

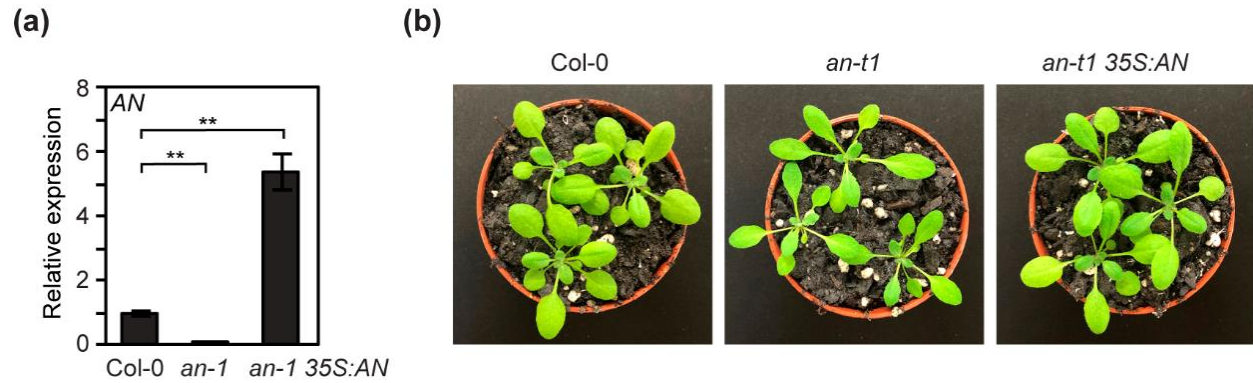

**Fig. S2** AN antagonistically regulates gene expression in SA and JA/ET pathways.

(a) qPCR analysis showing expression changes of *PR-1*, *PAL1*, *PAL2*, *PAL3*, *PAL4*, *ICS1*, *PBS3*, and *EDS5* in Col-0, *an-t1*, and *an-t1 35S:AN* at 0 and 6 hpi of *P. syringae* treatment.

(b) qPCR analysis showing expression changes of *PDF1.2*, *ACS2*, *ACS6*, *ERF1A*, and *ORA59* in Col-0, *an-t1*, and *an-t1 35S:AN* at 0 and 24 hpi of *B. cinerea* treatment. Gene expressions were normalized against the expression of *EF1a*. For each gene, its expression in Col-0 at 0 hpi was set as 1. Values represent means  $\pm$  SEM, n = 3. Statistical significance was determined by two tailed students t-tests against Col-0 (\*\*  $P < 0.01$ , \*  $P < 0.05$ , ns  $P > 0.05$ ).

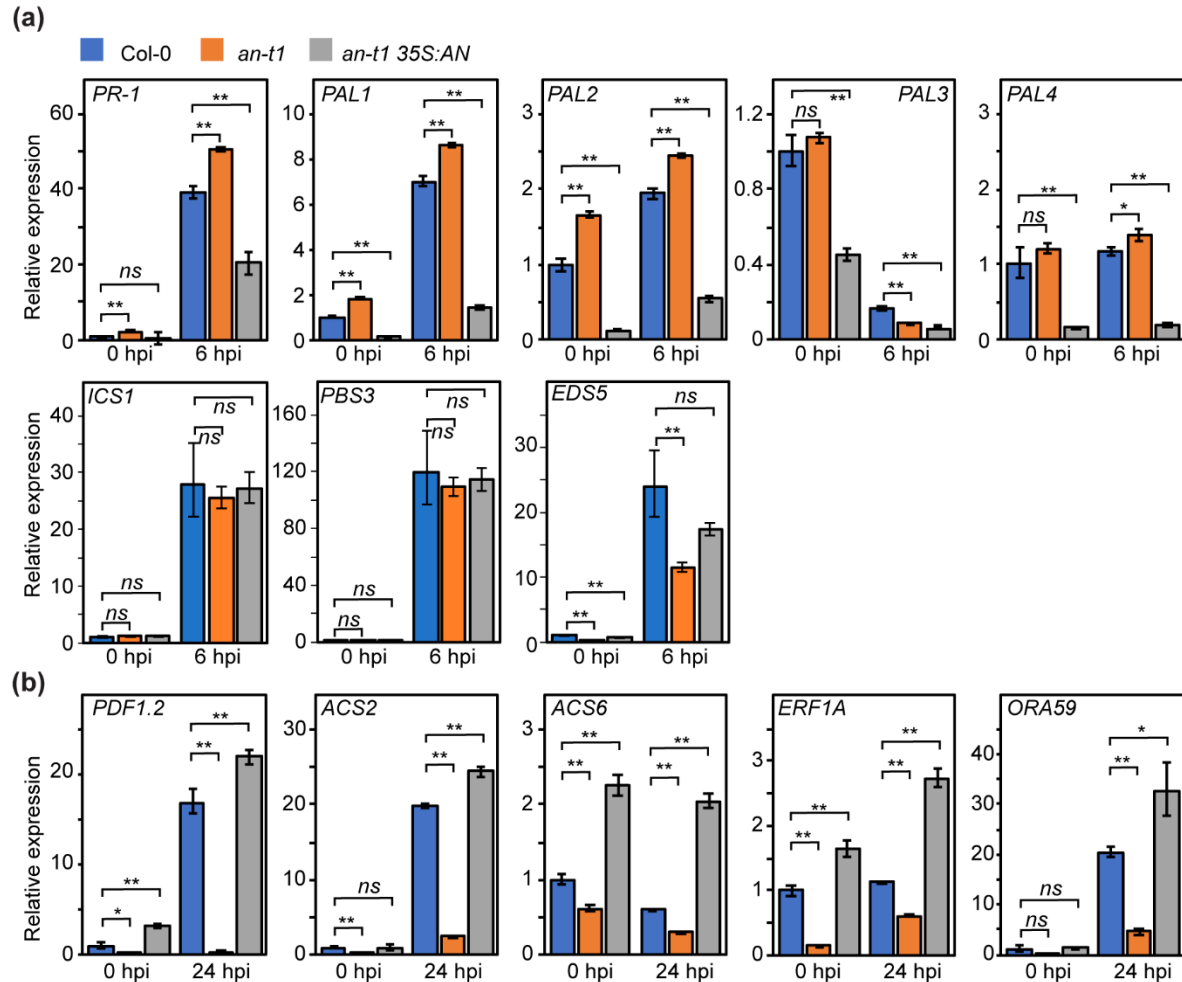

**Fig. S3** Yeast two-hybrid analysis of AN and TDP1 interaction.

AN was fused with Gal4 activation domain (AD). Full-length and truncated TDP1 were fused with Gal4 DNA binding domain (BD). SD-T-L, indicates SD plate without Trp and Leu. SD-T-L-H-A, indicates SD plate without Trp, Leu, His and Ade.

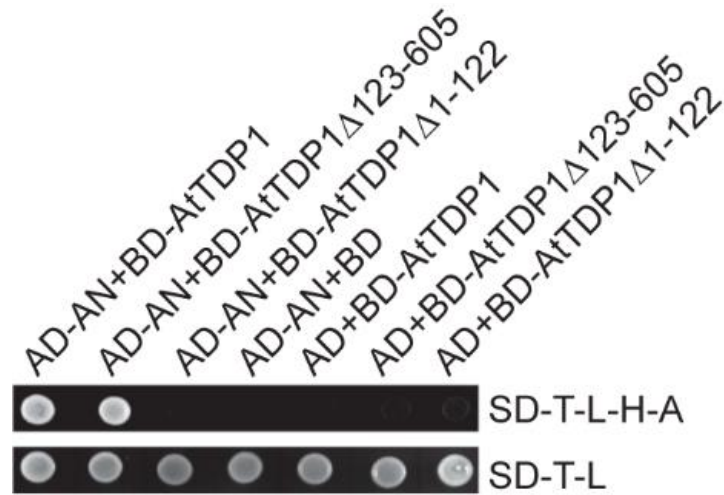

**Fig. S4**  $\mu$ ChIP-qPCR analysis using protoplasts co-expressing AN-Myc and HA-TDP1.  
**(a)** Western blot results showing AN and TDP1 co-expression did not change protein expression levels of AN-Myc or HA-TDP1. ACTIN was blotted as a loading control.  
**(b)**  $\mu$ ChIP-qPCR analysis demonstrating the enhancement of association of TDP1 with *MYB46* promoter by AN. Assays without antibody (no ab) were performed as negative controls. Values represent means  $\pm$  SEM, n = 3. Statistical significance was determined by two tailed students t-tests (\*\*  $P < 0.01$ ).

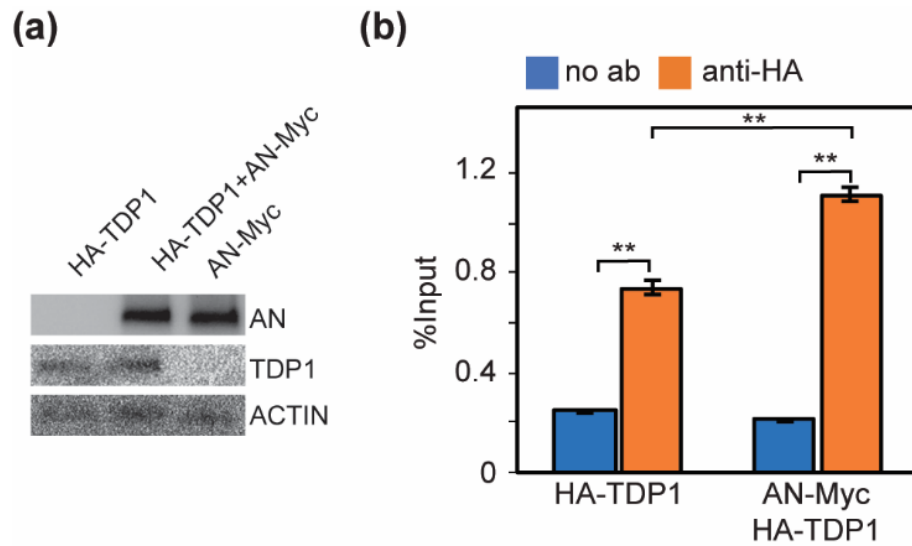

**Fig. S5** AN has no transcriptional activator activity.

Left scheme displays the two vectors used in transactivation analysis: reporter construct contains one Gal4 binding site upstream of *GUS* reporter gene; effector construct expressing GD fused AN. GD fused VP16 (GD-VP16) was used as a positive control. Values represent means  $\pm$  SEM,  $n = 3$ . Statistical significance was determined by two tailed students t-tests (\*\*  $P < 0.01$ ).

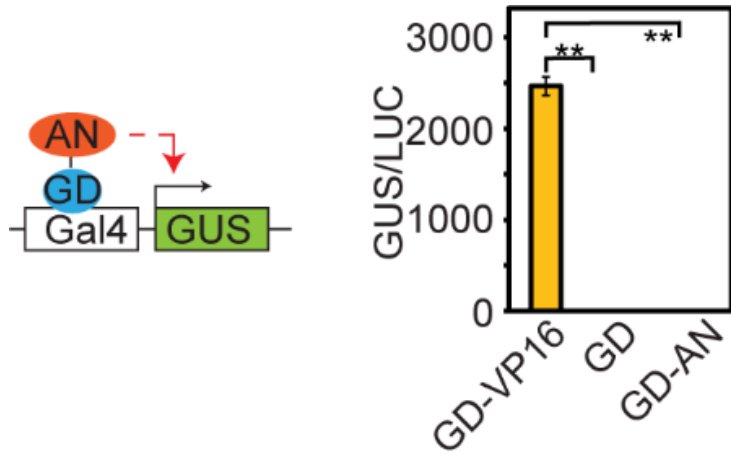

**Fig. S6** Transcription factors up- and down-regulated in *an-t1* mutant. Published RNA-seq data of *an-t1* mutant (Bryan AC, Zhang J, Guo J, Ranjan P, Singan V, Barry K, Schmutz J, Weighill D, Jacobson D, Jawdy S, et al. 2018. A Variable Polyglutamine Repeat Affects Subcellular Localization and Regulatory Activity of a *Populus* ANGUSTIFOLIA Protein. *G3 (Bethesda)* 8(8): 2631-2641) is used to plot the bar graph.

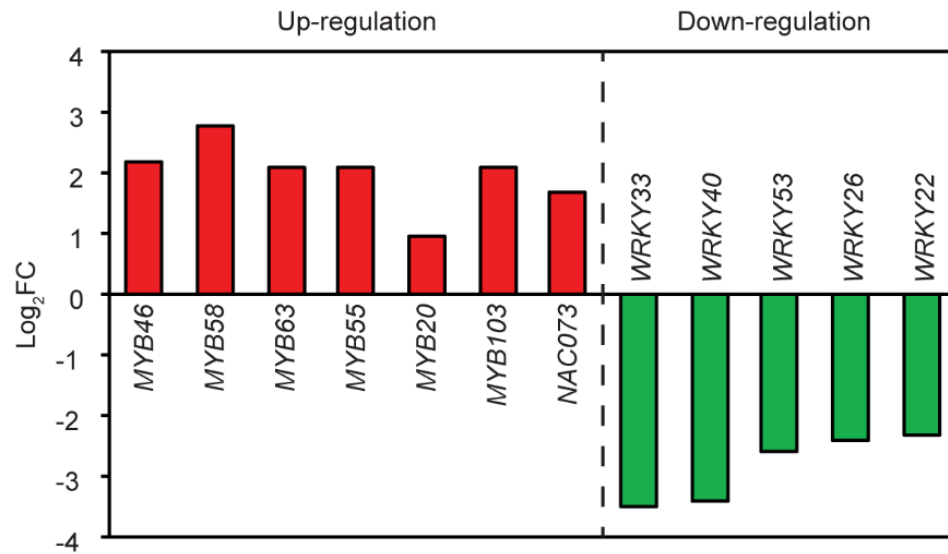

**Fig. S7** Amino acid sequence alignment of Arabidopsis TDP1 (AT5G15170) and Medicago TDP1 (XM\_003622639).

\*, identical amino acid. ., similar amino acid. Solid black line indicates the FHA domain and dashed black line indicates the TDP domain.

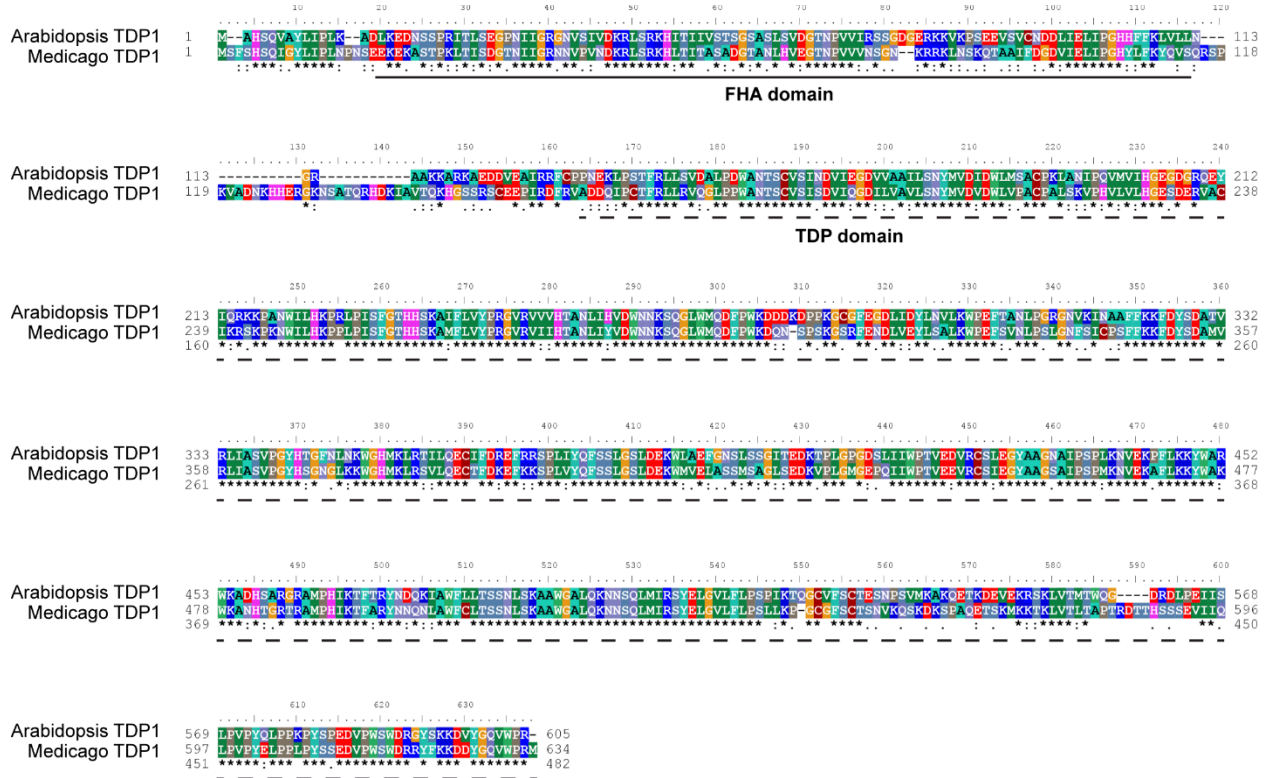



**Fig. S8** A model illustrating AN-mediated transcriptional regulation of plant resistance to *P. syringae* and *B. cinerea*.

The AN-TDP1 interaction translocates AN into the nucleus to repress the expression of *MYB46*. On the other hand, the AN-TDP1 interaction releases the transcriptional repression of *WRKY33* by sequestering TDP1 away from the *WRKY33* promoter. The AN-mediated antagonistic regulation of *MYB46* and *WRKY33* leads to the antagonistic regulation of expression of genes in the SA pathway (*PR-1*, *PAL1*, *PAL2*, etc.) and JA/ET pathway (*PDF1.2*, *ACS2/6*, *ERF1A*, *ORA59*, etc.), which results in elevated resistance to *B. cinerea* and increased susceptibility to *P. syringae*.

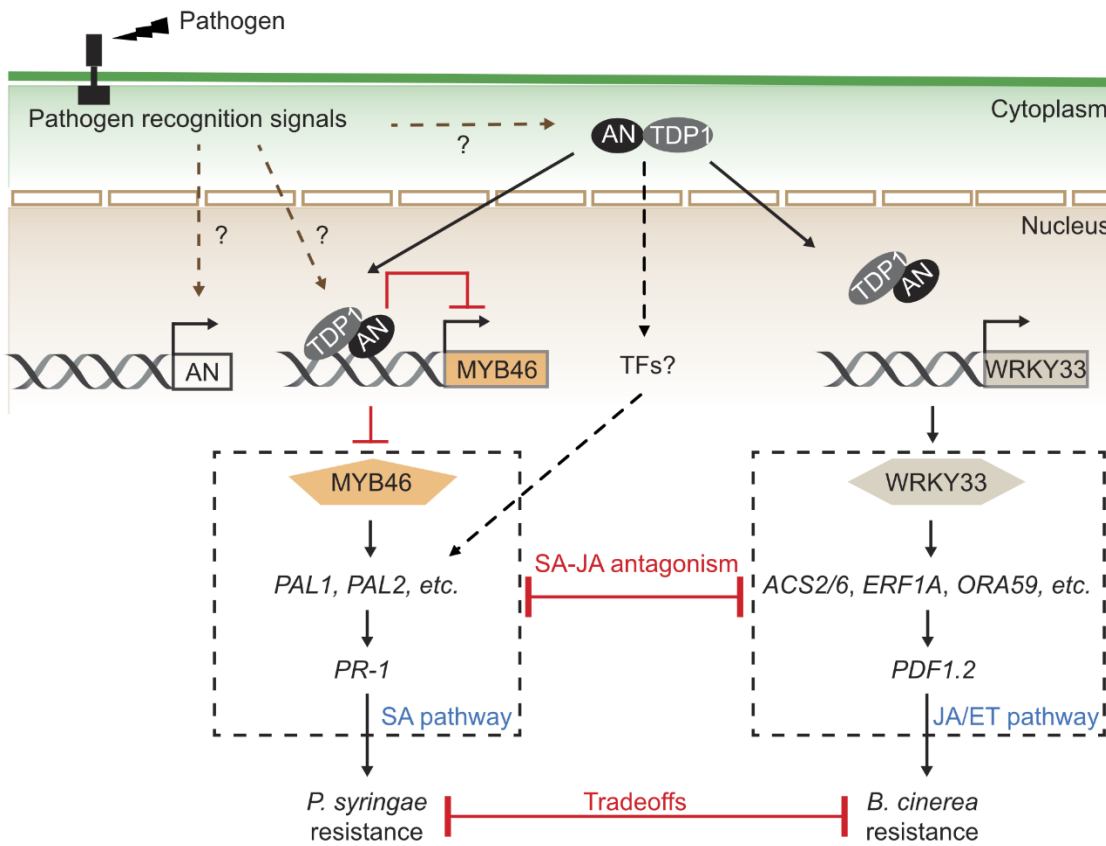

**Fig. S9** Total amounts of salicylic acid (SA) and salicylic acid 2-O-glucoside (SAG) in Col-0, *an-t1*, and *an-t1 35S:AN* in 0 hpi and 24 hpi of *P. syringae* inoculation. The unit of total amount is  $\mu\text{g/g}$  FW (sorbitol equivalents). Values represent means  $\pm$  SEM,  $n \geq 2$ . Statistical significance was determined by two tailed students t-tests (\*\*  $P < 0.01$ , \*  $P < 0.05$ , *ns*  $P > 0.05$ ).

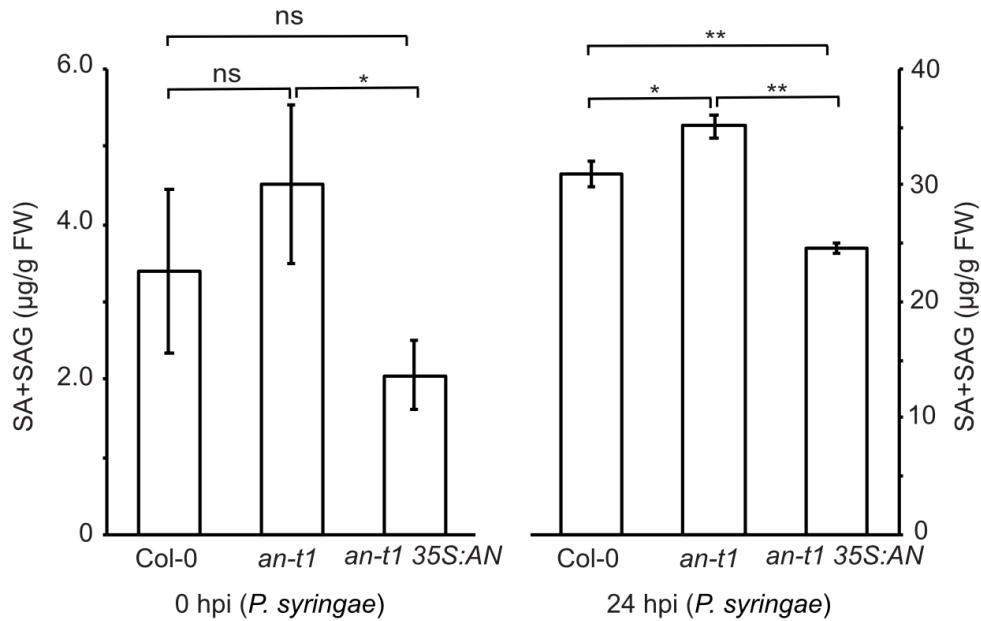

**Fig. S10** Pathogen infection changes the transcription and nuclear accumulation of AN.

**(a)** qPCR analysis showing expression changes of AN in Col-0 at 0 and 6 hpi of *P. syringae* treatment.

**(b)** qPCR analysis showing expression changes of AN in Col-0 at 0, 24, 48, and 72 hpi of *B. cinerea* treatment. Gene expressions were normalized against the expression of *EF1a*. Gene expressions in 0 hpi of pathogen treatment were set as 1. Values represent means  $\pm$  SEM, n = 3.

**(c)** western blotting indicating *P. syringae* treatment reduces the nuclear accumulation of AN. AN-Myc, HA-TDP1, UGPase (cytosolic marker), histone H3 (nuclear marker) are examined in cytosolic (C) and nuclear (N) fractions. AN-Myc signals were quantified using Image Lab (Bio-rad) and then normalized against corresponding nuclear or cytosolic marker to calculate the relative ratio of AN signals in cytosolic and nuclear fractions.

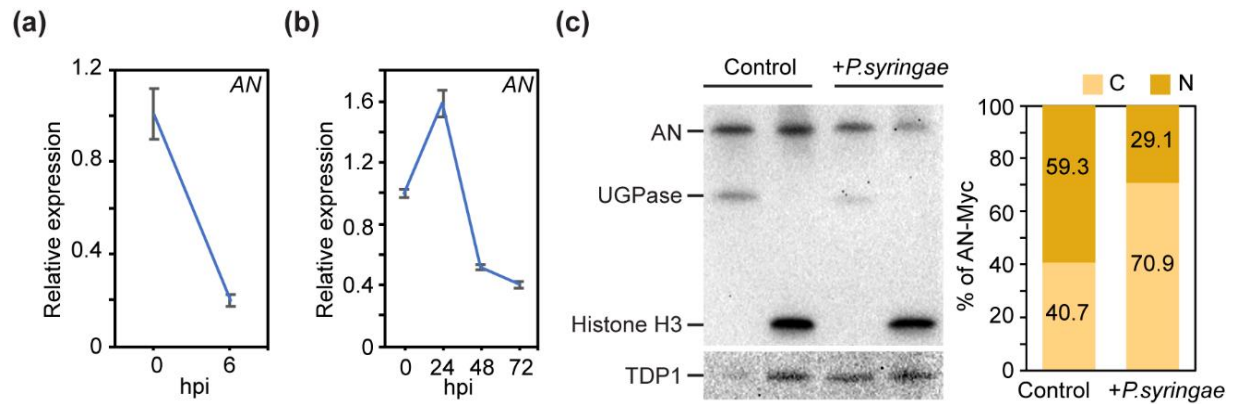

**Fig. S11** *tdp1-2* mutant has increased resistance to *P. syringae* and *B. cinerea*.

**(a)** *P. syringae* inoculation of Col-0 and *tdp1-2*. Bacterial titers in 0 hpi and 72 hpi are shown in the bar graph. Values represent means  $\pm$  SEM, n = 15.

**(b)** *B. cinerea* inoculation of Col-0 and *tdp1-2*. Scale bar: 1 mm. Lesion areas (% of total leaf area) in 0 hpi and 72 hpi are shown in the bar graph. Values represent means  $\pm$  SEM, n = 40.

Statistical significance was determined by two tailed students t-tests against Col-0 (\*\*  $P < 0.01$ , \*  $P < 0.05$ , *ns*  $P > 0.05$ ).

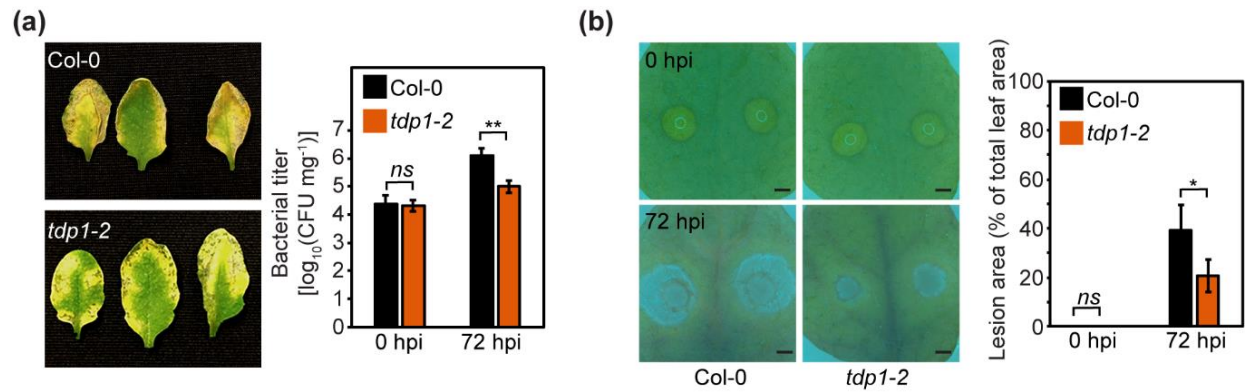

**Table S1** Primers used in this study.

| Name               | Sequence (5'-3')                | Applications     |
|--------------------|---------------------------------|------------------|
| AN CDS-F           | CACCATGAGCAAGATCCGTTTCGTCTG     | AN cloning       |
| AN-CDS-R           | TTAATCGATCCAACGTGTGATA          |                  |
| TDP1-pGBKT7-F      | CACCATGGCTCACTCTCAGGTTGCTT      | TDP1 cloning     |
| TDP1-pGBKT7-R      | ATGTTCGACCTATCTTGGCCAGACTTGTCCA |                  |
| P-MYB46-F          | CACCAAAAGGAGTATAACATTTTCTT      | Promoter cloning |
| P-MYB46-R          | CTATCTTGGCCAGACTTGTCCA          |                  |
| P-WRKY33-F         | CACCCAAACTCACTTCTAAATACTAA      | Promoter cloning |
| P-WRKY33-R         | CTGTATATTTGTTGGTTATGTC          |                  |
| AN qRT-F           | GTCTTCCCAAATCAGCTTG             | qPCR             |
| AN qRT-R           | CCGAGAGGTCTTTCGCATAC            |                  |
| TDP1 qRT-F         | TTACCTGGCCGTGGTAATGT            | qPCR             |
| TDP1 qRT-R         | GGTATCCAGGGACTGAAGCA            |                  |
| EF1 $\alpha$ qRT-F | TGAGCACGCTCTTCTTGCTTTCA         | qPCR             |
| EF1 $\alpha$ qRT-R | GGTGGTGGCATCCATCTTGTTACA        |                  |
| PR-1 qRT-F         | TTCTTCCCTCGAAAGCTCAA            | qPCR             |
| PR-1 qRT-R         | AAGGCCACCAGAGTGTATG             |                  |
| PR-3 qRT-F         | GGCAAACGCTACTACGGAAG            | qPCR             |
| PR-3 qRT-R         | GCAACAAGGTCAGGGTTGTT            |                  |
| AtPAL1 qRT-F       | GTGTCGCACTTCAGAAGGAA            | qPCR             |
| AtPAL1 qRT-R       | GGCTTGTTTCTTTCGTGCTT            |                  |
| AtPAL2 qRT-F       | GTGCTACTTCTCACCGGAGA            | qPCR             |
| AtPAL2 qRT-R       | TATTCCGGCGTTCAAAAATC            |                  |
| AtPAL3 qRT-F       | CAACCAAACGCAACAGCA              | qPCR             |
| AtPAL3 qRT-R       | CTCCAGGTGGCTCCCTTTTA            |                  |
| AtPAL4 qRT-F       | GGTGCACTTCAAAATGAGCT            | qPCR             |
| AtPAL4 qRT-R       | CAACGTGTGTGACGTGTCC             |                  |
| AtCESA3 qRT-F      | ACAGCCAACACAGTGCTCTC            | qPCR             |
| AtCESA3 qRT-R      | TGGTACCCATTTACGAGCAA            |                  |
| AtCESA4 qRT-F      | CTGTGGTTATGAAGAGAAGACTGAA       | qPCR             |
| AtCESA4 qRT-R      | TGCATTCTAAATCCAGTGAGGA          |                  |
| AtCESA7 qRT-F      | TTGTTGCAGGCATCTCAGATG           | qPCR             |
| AtCESA7 qRT-R      | GCAGTTGATGCCACACTTGGA           |                  |

|                 |                             |            |
|-----------------|-----------------------------|------------|
| AtCESA8 qRT-F   | TGAGCTTTACATTGTCAAATG       | qPCR       |
| AtCESA8 qRT-R   | GCAATCGATCAAAAGACAGTT       |            |
| MYB46 ChIP-P1-F | CCATGACCGATCAACTAACG        | ChIP-qPCR, |
| MYB46 ChIP-P1-R | GAACCCTGGCTCTTTTTCAA        |            |
| MYB46 ChIP-P2-F | CCCAGAATTGTAAGCAAACCA       | ChIP-qPCR  |
| MYB46 ChIP-P2-R | GGATCCATTGATGTGAACGA        |            |
| WRKY33 ChIP-F   | TCATACGTGTCAGAACGAGACA      | ChIP-qPCR  |
| WRKY33 ChIP-R   | CAGACCTTGTGGCCTTGACT        |            |
| ACS6 ChIP-F     | ATGAAAAGAATTCCGGTCCA        | ChIP-qPCR  |
| ACS6 ChIP-R     | TTGGAAAAGAAATGAGACATCAA     |            |
| ACS2 ChIP-F     | AAATTCCTTCCCAAATGGT         | ChIP-qPCR  |
| ACS2 ChIP-R     | ACAAGCGAACCAAGGAAAAA        |            |
| ERF1A ChIP-F    | CCAATCACACATTGCTTCG         | ChIP-qPCR  |
| ERF1A ChIP-R    | AAACACGTGCGTTTTATCCA        |            |
| ACTIN ChIP-F    | CGTTTCGCTTTCCTTAGTGTTAGCT   | ChIP-qPCR  |
| ACTIN ChIP-R    | AGCGAACGGATCTAGAGACTCACCTTG |            |
| MYB58 ChIP-F    | CGTCGAGAAATGTTGTGTGTG       | ChIP-PCR   |
| MYB58 ChIP-R    | TGGGTCCTATAACCCTGTAACAT     |            |
| MYB103 ChIP-F   | TTTATAAAATAATAGGTCAACCTCGAA | ChIP-PCR   |
| MYB103 ChIP-R   | CATGTATTATCCACTGTTTTCTCT    |            |
| MYB63 ChIP-F    | TGCATCGGTGTTAGAAGGAA        | ChIP-PCR   |
| MYB63 ChIP-R    | TTGTTGAGTGGGAAAAGGTTG       |            |
| MYB55 ChIP-F    | TCTACAATACTACCAAACAGAACCAA  | ChIP-PCR   |
| MYB55 ChIP-R    | GAGAGGAGGATTTGGGGAAT        |            |
| MYB20 ChIP-F    | GATTGAGCTCATAGTCCCGTTT      | ChIP-PCR   |
| MYB20 ChIP-R    | TTTTCTTATTTCGTGTCACCTTGG    |            |
| NAC073 ChIP-F   | TTTGTTTGATCAGTCTTTGTCCA     | ChIP-PCR   |
| NAC073 ChIP-R   | TTGCTTGGGTTTTAAGTTTGG       |            |
| WRKY53 ChIP-F   | CACTCTGGCCCTATACTTCCTT      | ChIP-PCR   |
| WRKY53 ChIP-R   | TTGACCAAATGACCAAACCA        |            |
| WRKY26 ChIP-F   | ATTCAGCCGCCTTACACAAA        | ChIP-PCR   |
| WRKY26 ChIP-R   | TCCAAGGAAAAGCAAGCAAT        |            |
| WRKY22 ChIP-F   | ACAAACCGAACCGCTTTTTA        | ChIP-PCR   |
| WRKY22 ChIP-R   | AGAACAAACCGCTGCAAACCT       |            |

|               |                      |          |
|---------------|----------------------|----------|
| WRKY40 ChIP-F | GCCGGCTATGCTATAACGAA | ChIP-PCR |
| WRKY40 ChIP-R | TATGACGCTCTCCACGTTG  |          |
